# Supplementary material for: Effect of doping mediated oxygen vacancies on the charge transfer ability of zinc oxide nanosheets for electrochemical glucose sensing
Source: Royal Society of Chemistry journal article supplement (doi:10.1039/d3sd00044c), 2023-01-01
Supplement: d3sd00044c1.pdf [file d3sd00044c1.pdf]

## **Supplementary Information**

### **Consequence of doping mediated Oxygen vacancies on charge transfer ability of Zinc Oxide Nanosheets for electrochemical glucose sensing**

Saptaka Baruah<sup>a</sup>, Bidyarani Maibam<sup>a</sup>, Jyoti Jaiswal<sup>a</sup>, Ankit Kumar<sup>b</sup>, and Sanjeev Kumar<sup>a\*</sup>

<sup>a</sup>*Centre for Advanced Research, Department of Physics, Rajiv Gandhi University, Arunachal Pradesh-791112, India.*

<sup>b</sup>*Department of Mechanical & Industrial Engineering (MIED), IIT Roorkee, Roorkee 247667, India.*

\*Corresponding author email: [sanjeev.kumar@rgu.ac.in](mailto:sanjeev.kumar@rgu.ac.in)

## **S1. Experimental details**

### ***S1.1 Synthesis of pristine-ZnO and Ag-doped ZnO nanosheets***

In this work, pristine-ZnO, 1% Ag-doped ZnO (ZnO:Ag1), 2% Ag-doped ZnO (ZnO:Ag2), 3% Ag-doped ZnO (ZnO:Ag3), 4% Ag-doped ZnO (ZnO:Ag4) and 5% Ag-doped ZnO (ZnO:Ag5) were synthesized using hydrothermal method. To prepare these samples, firstly, 1 M Zn(NO<sub>3</sub>)<sub>2</sub>·6H<sub>2</sub>O and 1 M AgNO<sub>3</sub> solutions were made in double-distilled water and mixed in proportionality as required. After that 5 M NaOH solution was added dropwise. The mixed solution was stirred continuously for 2 hours and then placed in a Teflon-lined stainless-steel autoclave and kept at 180 °C for 24 hours. The product was then rinsed with double-distilled water and dried for 24 hours at 100 °C before being calcined for 2 hours at 500 °C.

### ***S1.2 Fabrication of ZnO/ITO and Ag-doped ZnO/ITO Electrodes***

Indium Tin Oxide (ITO) coated glasses were used as a substrate material for the fabrication of working electrodes. At first, ITO substrates were dipped in ethanol and cleaned by a sonication process followed by thorough rinsing using double-distilled water. Now, for the fabrication of the ZnO/ITO electrode, 10 µL solution of dispersed ZnO nanosheets was drop-casted onto ITO-coated glass. Likewise, 1% to 5% of Ag-doped ZnO electrodes were fabricated using the same process. Finally, the prepared electrodes were dried at room temperature for 24 hours.

### ***S1.3 Immobilization of GO<sub>x</sub> on the electrodes***

For the application of enzymatic glucose sensing, prior to immobilization, freshly prepared GO<sub>x</sub> solution (10 µL, 4 mg/mL) was dropped on the ZnO/ITO, ZnO:Ag2/ITO, and ZnO:Ag5/ITO electrodes, and then the electrodes were dried at room temperature for 30 min. To eliminate mobilized GO<sub>x</sub>, the electrodes were rinsed with distilled water. Since the enzyme denatures when exposed to ambient temperature for an extended period, the immobilized electrode was stored at 4 °C when not in use.

## **S2. Results and discussion**

### ***S2.1 Characterization of synthesized pristine and Ag-doped ZnO nanosheets***

Figure 2 shows the FESEM micrograph of the pristine and Ag-doped ZnO samples at low and high resolution (corresponding inset Figure 2). FESEM images (Figure 2(a-d)) revealed the development of nanosheets in pristine-ZnO, ZnO:Ag1, ZnO:Ag2, and ZnO:Ag3. While the mixture of nanosheets and dendrite-like structures were found in ZnO:Ag4 and ZnO:Ag5 (Figure 2(e,f)). Doping may cause the asymmetrical and multidimensional growth in ZnO:Ag4 and ZnO:Ag5 which result in the formation of dendrite-like structures [2]. The size and thickness of pristine-ZnO and Ag-doped ZnO nanosheets were found to decrease with an increase in dopant concentration. This is because metal-doping in ZnO at an appropriate level inhibits particle growth due to the symmetry-breaking effects of the dopant at the grain boundary [3, 4].

As shown in Figure S1(a), for pristine-ZnO, the EDX spectra revealed 47.80 at% of O, 52.20 at% of Zn. While spectra of ZnO:Ag5 (Figure S1(b)) revealed 44.82 at% of O and 52.46 at% of Zn and 2.72 at% of Ag with 6.61 wt%. EDX results further confirm the formation of pristine-ZnO and the successful incorporation of Ag dopants in the ZnO host matrix.

Figure S3 shows the FTIR spectra for the pristine-ZnO, GOx/ZnO, ZnO:Ag2, GOx/ZnO:Ag2, ZnO:Ag5, and GOx/ZnO:Ag5 samples. FTIR spectra of pristine-ZnO revealed the multiple bands observed at  $\sim 3439.18\text{ cm}^{-1}$  (O-H stretching),  $\sim 1633.54$  and  $\sim 1384\text{ cm}^{-1}$  (H-O-H bending vibration),  $\sim 1029.78\text{ cm}^{-1}$  (O-H bending mode), and  $\sim 557.68$  and  $\sim 465\text{ cm}^{-1}$  (stretching vibration of Zn-O) indicating the formation of ZnO including the presence of small quantity of moisture and hydroxyl group on the surface of ZnO [5-7]. However, for ZnO:Ag2 and ZnO:Ag5, a small shift towards the low frequencies was noted, which indicates the successful incorporation of Ag ions into the ZnO matrix [8]. The reduction in band intensity observed in Ag-doped ZnO may be due to the formation of Ag particles on the surface of pristine-ZnO [9, 10], which is also corroborated with our XRD results. Further, FTIR spectra of GOx/ZnO matrix demonstrated absorption bands at  $\sim 3455.17\text{ cm}^{-1}$  (combination of both N-H and O-H stretching),  $\sim 2352.97\text{ cm}^{-1}$  (N-H stretching vibration),  $\sim 1072.64\text{ cm}^{-1}$  (phosphate ion adsorption),  $\sim 536.61\text{ cm}^{-1}$  (stretching vibration of Zn-O), and three bands linked to the peptide structure, i.e., amide I  $\sim 1645.76\text{ cm}^{-1}$  (C=O stretching and H-O-H bending vibration), amide II  $\sim 1551\text{ cm}^{-1}$  (N-H bending) and amide III  $\sim 1241.3$  (C-N and C-H stretching), which confirm the successful immobilization of GOx on the pristine-ZnO matrix [11, 12]. However, the same characteristic bands for GOx were also observed for GOx/ZnO:Ag2 and GOx/ZnO:Ag5 samples, signifying further the successful immobilization of GOx on the surface of the Ag-doped ZnO samples.

## References

- [1] Ridhuan, N. S., Razak, K. A., & Lockman, Z. (2018). Fabrication and characterization of glucose biosensors by using hydrothermally grown ZnO nanorods. *Scientific reports*, 8(1), 1-12.
- [2] Maibam, B., Baruah, S., & Kumar, S. (2020). Photoluminescence and intrinsic ferromagnetism of Fe doped zinc oxide. *SN Applied Sciences*, 2(10), 1-11.
- [3] Khan, M. M., Kumar, S., Khan, M. N., Ahamed, M., & Al Dwayyan, A. S. (2014). Microstructure and blueshift in optical band gap of nanocrystalline  $\text{Al}_x\text{Zn}_{1-x}\text{O}$  thin films. *Journal of luminescence*, 155, 275-281.
- [4] Ahamed, M., Khan, M. A., Akhtar, M. J., Alhadlaq, H. A., & Alshamsan, A. (2017). Ag-doping regulates the cytotoxicity of TiO<sub>2</sub> nanoparticles via oxidative stress in human cancer cells. *Scientific reports*, 7(1), 1-14.
- [5] Goswami, M., Adhikary, N. C., & Bhattacharjee, S. (2018). Effect of annealing temperatures on the structural and optical properties of zinc oxide nanoparticles prepared by chemical precipitation method. *Optik*, 158, 1006-1015.
- [6] Raja, K., Ramesh, P. S., & Geetha, D. (2014). Structural, FTIR and photoluminescence studies of Fe doped ZnO nanopowder by co-precipitation method. *Spectrochimica Acta Part A: Molecular and Biomolecular Spectroscopy*, 131, 183-188.
- [7] Reddy, A. J., Kokila, M. K., Nagabhushana, H., Chakradhar, R. P. S., Shivakumara, C., Rao, J. L., & Nagabhushana, B. M. (2011). Structural, optical and EPR studies on ZnO: Cu nanopowders prepared via low temperature solution combustion synthesis. *Journal of Alloys and Compounds*, 509(17), 5349-5355.
- [8] Wannas, H. B., Dimassi, W. R., Zaghouni, B., & Mendes, M. J. (2017). Li-doped ZnO Sol-Gel Thin Films: Correlation between Structural Morphological and Optical Properties. *J Textile Sci Eng*, 8(328), 2.

- [9] Nagaraju, G., Prashanth, S. A., Shastri, M., Yathish, K. V., Anupama, C., & Rangappa, D. (2017). Electrochemical heavy metal detection, photocatalytic, photoluminescence, biodiesel production and antibacterial activities of Ag–ZnO nanomaterial. *Materials Research Bulletin*, *94*, 54-63.
- [10] Zamiri, R., Rebelo, A., Zamiri, G., Adnani, A., Kuashal, A., Belsley, M. S., & Ferreira, J. M. F. (2014). Far-infrared optical constants of ZnO and ZnO/Ag nanostructures. *RSC Advances*, *4*(40), 20902-20908.
- [11] Singh, P., Benjakul, S., Maqsood, S., & Kishimura, H. (2011). Isolation and characterisation of collagen extracted from the skin of striped catfish (*Pangasianodon hypophthalmus*). *Food chemistry*, *124*(1), 97-105.
- [12] Uc-Cayetano, E. G., Ordóñez, L. C., Cauich-Rodríguez, J. V., & Avilés, F. (2016). Enhancement of electrochemical glucose sensing by using multiwall carbon nanotubes decorated with iron oxide nanoparticles. *Int. J. Electrochem. Sci*, *11*, 6356-6369.

**Table**

**Table S1:** Binding energy values of Zn2p<sub>3/2</sub>, Zn2p<sub>1/2</sub>, O1s, and the ratio of the sub-peaks area  $\frac{O(II)}{O(I)+O(II)}$  for the pristine and Ag-doped ZnO nanosheets.

| Sample  | Binding energy (eV) |                     |             |             |            |                     |                     | Ratio of sub-peaks area<br>O(II)/[O(I) + O(II)] |
|---------|---------------------|---------------------|-------------|-------------|------------|---------------------|---------------------|-------------------------------------------------|
|         | Zn2p                |                     | O1s         |             |            | Ag3d                |                     |                                                 |
|         | Zn2p <sub>3/2</sub> | Zn2p <sub>1/2</sub> | O(I)        | O(II)       | O(III)     | Ag3d <sub>5/2</sub> | Ag3d <sub>3/2</sub> |                                                 |
| ZnO     | ~1021.15            | ~1044.1<br>5        | ~529.9<br>7 | ~531.2<br>4 | ~531.<br>9 | —                   | —                   | ~0.9                                            |
| ZnO:Ag5 | ~1020.92            | ~1043.9<br>2        | ~529.6<br>1 | ~530.7<br>1 | ~532.<br>7 | ~368.8<br>1         | ~374.8<br>1         | ~0.4                                            |

**Table S2:** EIS parameters obtained by fitting the Nyquist plot with the equivalent circuit for the pristine and Ag-doped ZnO nanosheets based electrodes.

| Sample      | $C_{dl} \times 10^{-6}$ (F) | $R_s$ ( $\Omega$ ) | $R_{ct}$ ( $\Omega$ ) | $Z_w \times 10^{-2}$ ( $Ss^{1/2}$ ) |
|-------------|-----------------------------|--------------------|-----------------------|-------------------------------------|
| ZnO/ITO     | ~6.1                        | ~83.2              | ~148.4                | ~1.2                                |
| ZnO:Ag1/ITO | ~2.9                        | ~130.2             | ~131.8                | ~0.7                                |
| ZnO:Ag2/ITO | ~8.9                        | ~77.7              | ~114                  | ~1.4                                |
| ZnO:Ag3/ITO | ~6.6                        | ~99.9              | ~101.6                | ~1.3                                |
| ZnO:Ag4/ITO | ~5.3                        | ~120               | ~82.6                 | ~1.31                               |
| ZnO:Ag5/ITO | ~10.2                       | ~78.5              | ~51.9                 | ~2.33                               |

**Table S3:** The  $\frac{I_{pa}}{I_{pc}}$  ratio at scan rate 10 mV/s, diffusion coefficient ( $D$ ), surface concentration ( $I^*$ ), electroactive surface area ( $A_e$ ), sensitivity, Michaelis-Menten constant ( $K_m^{app}$ ), limit of detection (LOD) and linear range of prepared electrodes.

| Samples         | $I_{pa}/I_{pc}$ | $D \times 10^{-6}$<br>( $cm^2 s^{-1}$ ) | $I^* \times 10^{-9}$<br>( $mol cm^{-2}$ ) | $A_e$<br>( $cm^2$ ) | Sensitivity<br>( $\mu AMm^{-1}cm^{-2}$ ) | $K_m^{app}$<br>(mM) | LOD<br>(mM) | Linear<br>range<br>(mM) |
|-----------------|-----------------|-----------------------------------------|-------------------------------------------|---------------------|------------------------------------------|---------------------|-------------|-------------------------|
| ZnO/ITO         | 1.03            | 3.62                                    | 5.75                                      | 0.68                | —                                        | —                   | —           | —                       |
| ZnO:Ag1/ITO     | 1.04            | 6.19                                    | 7.58                                      | 0.682               | —                                        | —                   | —           | —                       |
| ZnO:Ag2/ITO     | 1.02            | 6.82                                    | 8.33                                      | 0.713               | —                                        | —                   | —           | —                       |
| ZnO:Ag3/ITO     | 1.02            | 9.86                                    | 9.61                                      | 0.685               | —                                        | —                   | —           | —                       |
| ZnO:Ag4/ITO     | 1.03            | 13.9                                    | 11.4                                      | 0.686               | —                                        | —                   | —           | —                       |
| ZnO:Ag5/ITO     | 1.1             | 16.2                                    | 13.7                                      | 0.746               | 104.7                                    | —                   | 0.06        | 0-4                     |
| GOx/ZnO/ITO     | 1.05            | 3.29                                    | 4.97                                      | 0.618               | 37.5                                     | 0.07                | 0.204       | 0-3                     |
| GOx/ZnO:Ag2/ITO | 1.02            | 4.32                                    | 6.30                                      | 0.683               | 15.3                                     | 0.04                | 0.451       | 0-3                     |
| GOx/ZnO:Ag5/ITO | 1.05            | 6.12                                    | 5.38                                      | 0.487               | 98.3                                     | 0.26                | 0.098       | 0-3                     |

## Figures

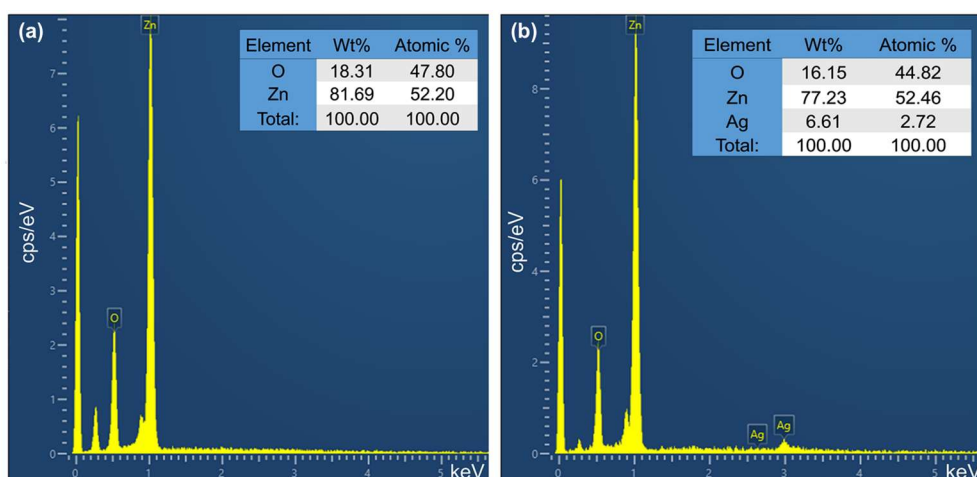

**Figure S1:** EDX spectra of (a) pristine-ZnO and (b) ZnO:Ag5 nanosheets.

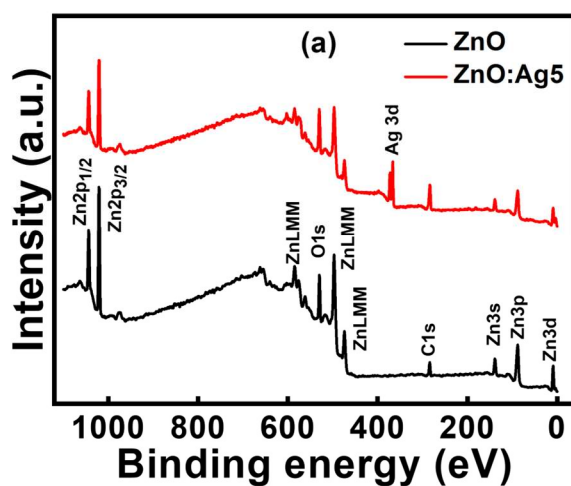

**Figure S2:** The XPS survey scan of the pristine-ZnO and ZnO:Ag5 nanosheets.

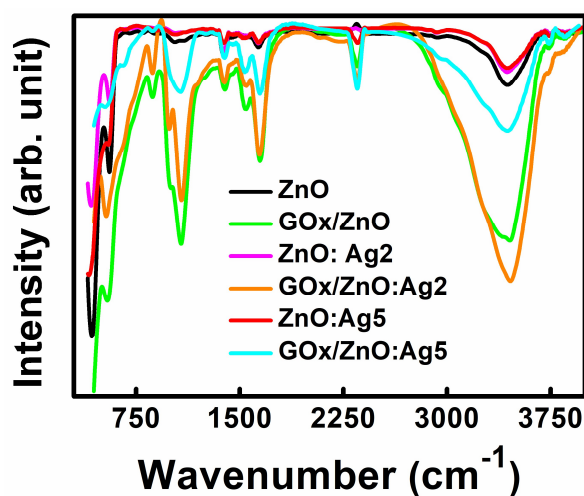

**Figure S3:** FTIR spectra for pristine-ZnO, GOx/ZnO, ZnO:Ag2, GOx/ZnO:Ag2, ZnO:Ag5, and GOx/ZnO:Ag5 samples.

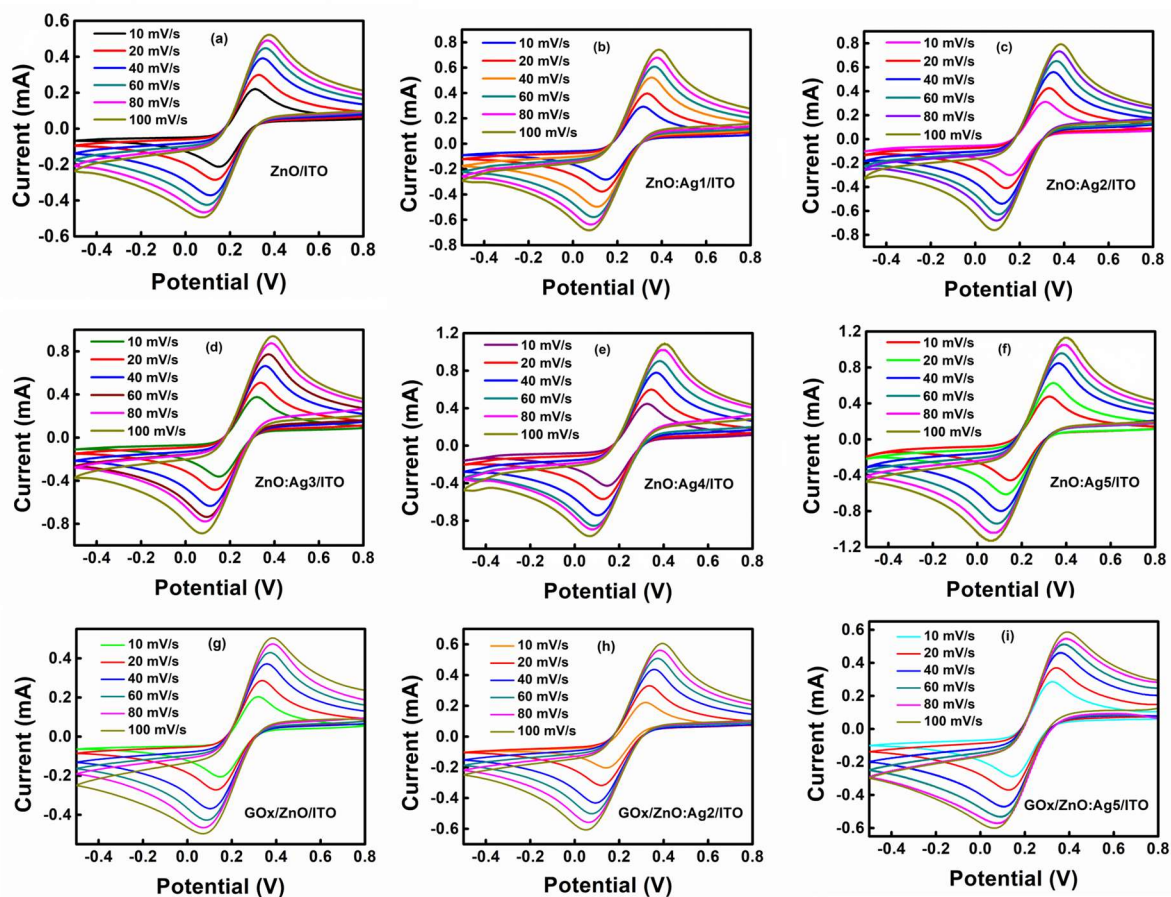

**Figure S4:** Cyclic voltammogram (CV) of all the prepared electrodes: (a) ZnO/ITO, (b) ZnO:Ag1/ITO, (c) ZnO:Ag2/ITO, (d) ZnO:Ag3/ITO, (e) ZnO:Ag4/ITO, (f) ZnO:Ag5/ITO, (g) GOx/ZnO/ITO, (h) GOx/ZnO:Ag2/ITO, and (i) GOx/ZnO:Ag5/ITO in 0.01 M PBS (pH 7.4) buffer solution containing 5 mM  $[\text{Fe}(\text{CN})_6]^{3-/4-}$  at different scan rates within 10-100  $\text{mV s}^{-1}$ .

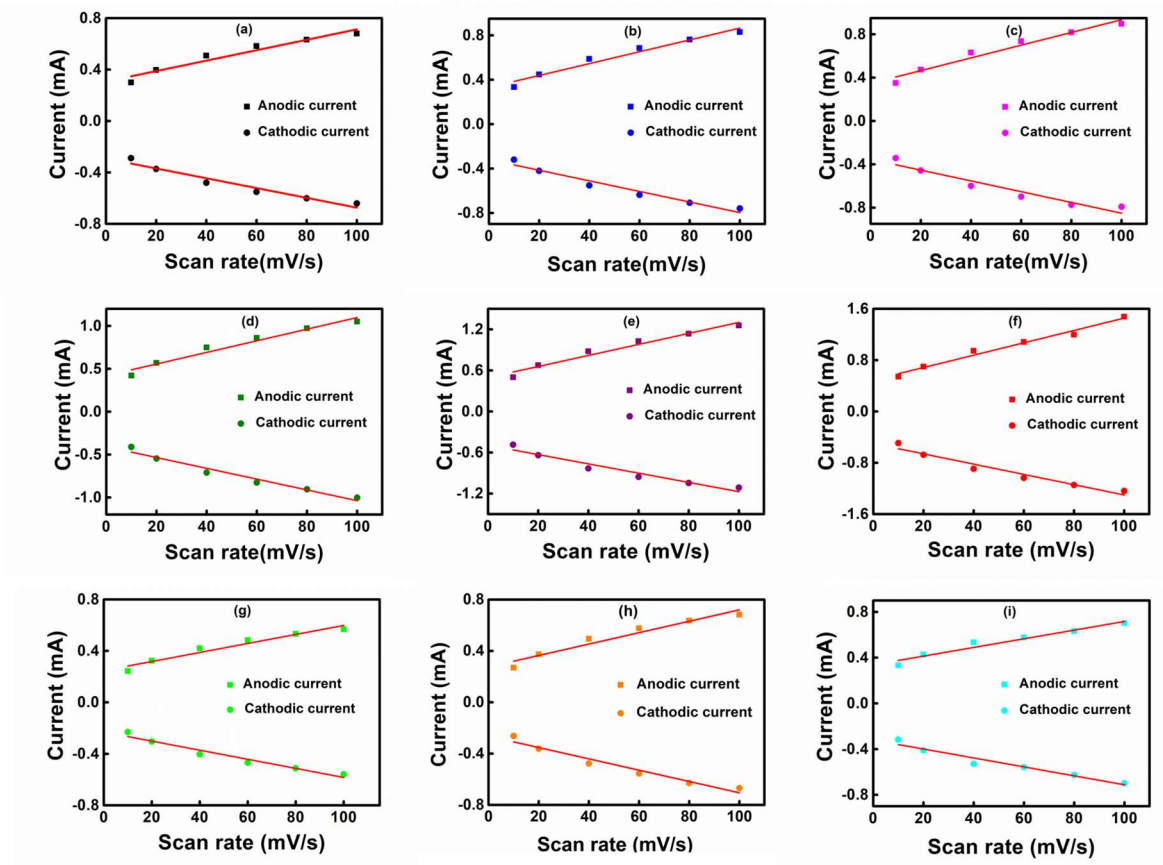

**Figure S5:** Peak current vs scan rate of all the prepared electrodes: (a) ZnO/ITO, (b) ZnO:Ag1/ITO, (c) ZnO:Ag2/ITO, (d) ZnO:Ag3/ITO, (e) ZnO:Ag4/ITO, (f) ZnO:Ag5/ITO, (g) GOx/ZnO/ITO, (h) GOx/ZnO:Ag2/ITO, and (i) GOx/ZnO:Ag5/ITO.

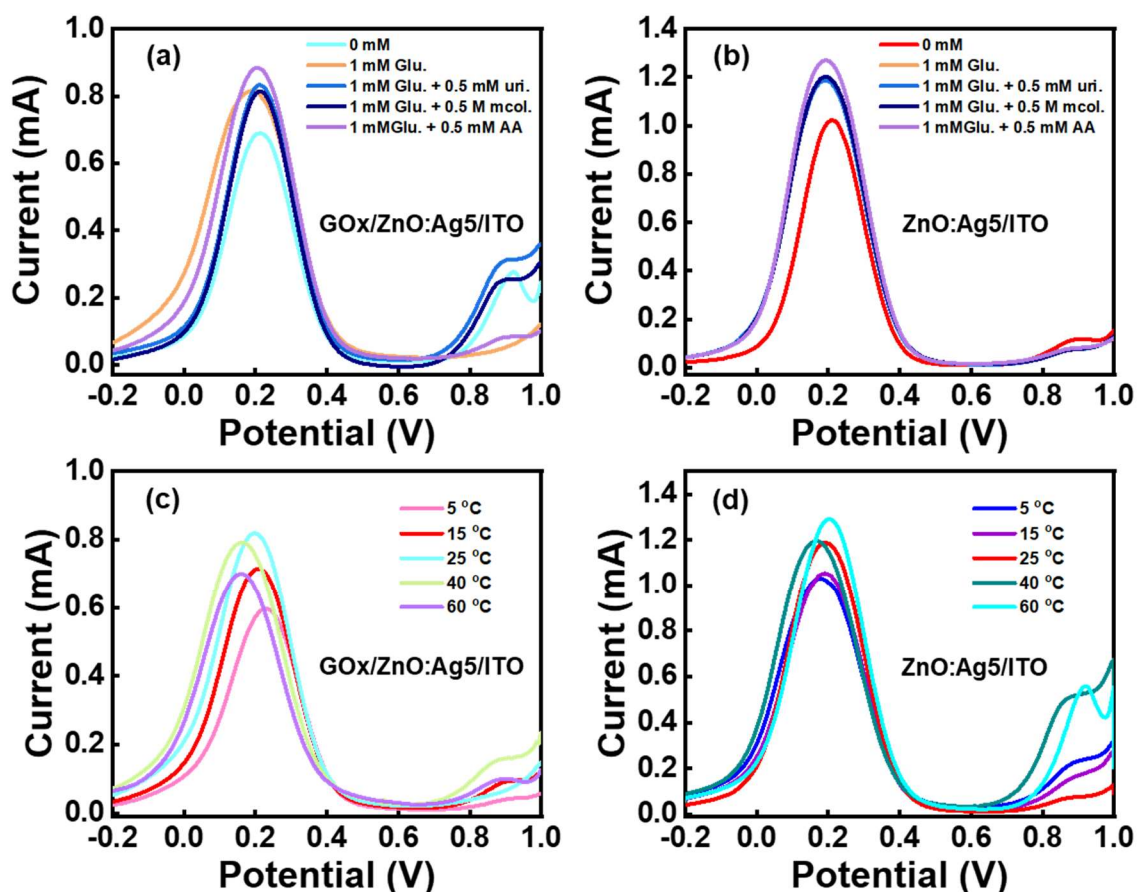

**Figure S6:** Square wave voltammogram (SWV) of the (a) GOx/ZnO:Ag5/ITO and (b) ZnO:Ag5/ITO electrodes in the presence of 1 mM glucose with 0.5 mM interfering species (Cholesterol, Uric Acid (UA) and Ascorbic Acid (AA)) in 0.01 M PBS (pH 7.4) buffer solution containing 5 mM  $[\text{Fe}(\text{CN})_6]^{3-/4-}$ . SWV of the (c) GOx/ZnO:Ag5/ITO and (d) ZnO:Ag5/ITO electrodes at different temperatures (5-60 °C) in 0.01 M PBS (pH 7.4) buffer solution containing 5 mM  $[\text{Fe}(\text{CN})_6]^{3-/4-}$  and 1 mM glucose.



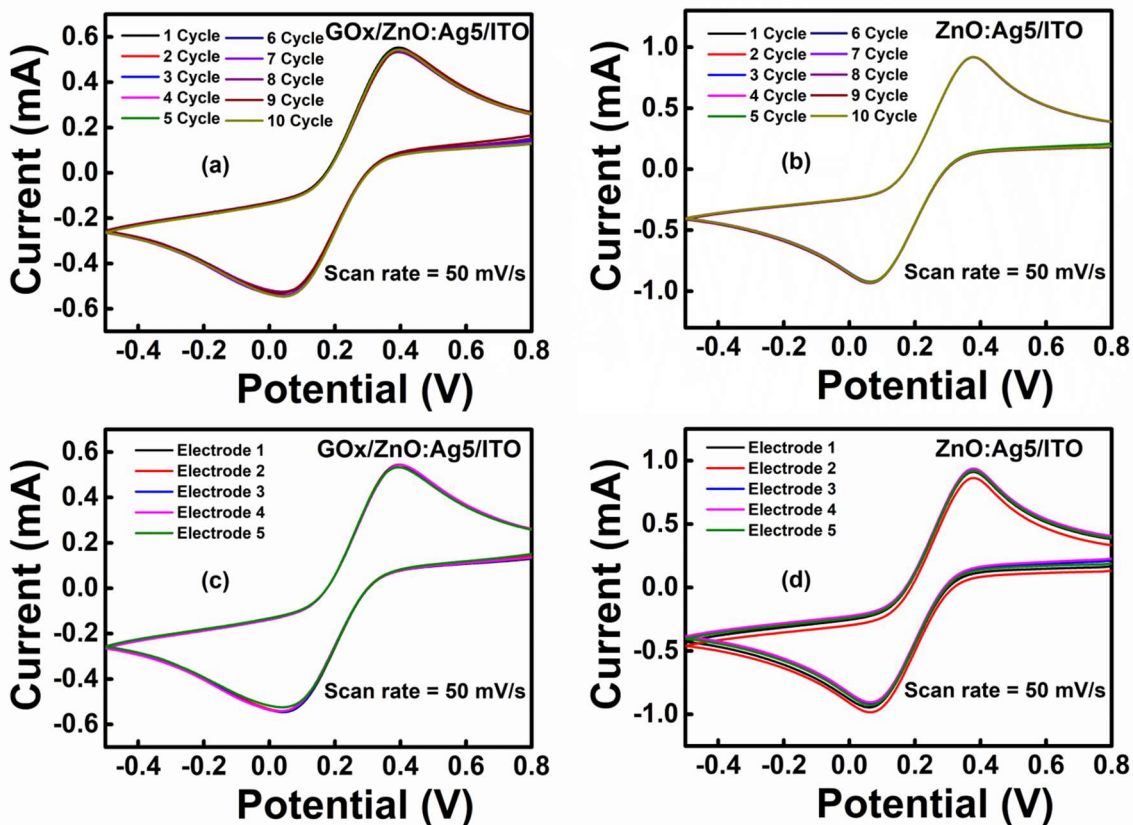

**Figure S7:** CV of the GOx/ZnO:Ag5/ITO (a) and ZnO:Ag5/ITO (b) electrodes with 10 measurements at scan rate of  $50 \text{ mV s}^{-1}$  in 0.01 M PBS (pH 7.4) buffer solution containing 5 mM  $[\text{Fe}(\text{CN})_6]^{3-/4-}$  and 1 mM glucose. CV of five different GOx/ZnO:Ag5/ITO (c) and ZnO:Ag5/ITO (d) electrodes at scan rate of  $50 \text{ mV s}^{-1}$  in 0.01 M PBS (pH 7.4) buffer solution containing 5 mM  $[\text{Fe}(\text{CN})_6]^{3-/4-}$  and 1 mM glucose.
